# 1 **The time between vaccination and infection impacts immunity against** 2 **SARS-CoV-2 variants**

3 Timothy A. Bates<sup>1</sup>, Hans C. Leier<sup>1</sup>, Savannah K. McBride<sup>1</sup>, Devin Schoen<sup>2</sup>, Zoe L. Lyski<sup>1</sup>, David  
4 X. Lee<sup>1</sup>, William B. Messer<sup>1,2,3,#</sup>, Marcel E. Curlin<sup>2,#</sup>, Fikadu G. Tafesse<sup>1,#</sup>

5 <sup>1</sup>Department of Molecular Microbiology & Immunology, Oregon Health & Science University; Portland, OR  
6 97239, United States. <sup>2</sup>Division of Infectious Diseases, Oregon Health & Science University; Portland, OR  
7 97239, United States. <sup>3</sup>OHSU-PSU School of Public Health, Oregon Health & Science University; Portland,  
8 OR 97239, United States

9

10 #Corresponding authors

11 Fikadu G. Tafesse – [tafesse@ohsu.edu](mailto:tafesse@ohsu.edu)

12 Marcel E. Curlin – [curlin@ohsu.edu](mailto:curlin@ohsu.edu)

13 William B. Messer – [messer@ohsu.edu](mailto:messer@ohsu.edu)

14

## 15 **Abstract**

16 As the COVID-19 pandemic continues, long-term immunity against SARS-CoV-2 will be globally  
17 important. Official weekly cases have not dropped below 2 million since September of 2020, and  
18 continued emergence of novel variants have created a moving target for our immune systems  
19 and public health alike. The temporal aspects of COVID-19 immunity, particularly from repeated  
20 vaccination and infection, are less well understood than short-term vaccine efficacy. In this study,  
21 we explore the impact of combined vaccination and infection, also known as hybrid immunity, and  
22 the timing thereof on the quality and quantity of antibodies produced by a cohort of 96 health care  
23 workers. We find robust neutralizing antibody responses among those with hybrid immunity  
24 against all variants, including Omicron BA.2, and we further found significantly improved  
25 neutralizing titers with longer vaccine-infection intervals up to 400 days. These results indicate  
26 that anti-SARS-CoV-2 antibody responses undergo continual maturation following primary  
27 exposure by either vaccination or infection for at least 400 days after last antigen exposure. We  
28 show that neutralizing antibody responses improved upon secondary boosting with greater impact  
29 seen after extended intervals. Our findings may also extend to booster vaccine doses, a critical  
30 consideration in future vaccine campaign strategies.

## 31 Introduction

32 Since the emergence of severe acute respiratory syndrome coronavirus 2 (SARS-CoV-2) in late  
33 2019, the coronavirus disease 2019 (COVID-19) pandemic has continued to expand and contract  
34 at regular intervals, and it remains an ongoing threat to global public health. As of August 2022,  
35 the number of officially recognized cases is approaching 600 million,<sup>1</sup> and the true number of  
36 people with at least one previous infection is likely much higher with estimates upwards of 3.4  
37 billion, 44% of the global population, even before the emergence of the Omicron variant.<sup>2</sup> Due to  
38 ongoing transmission and the continued emergence of novel SARS-CoV-2 variants, it is likely that  
39 this number will continue to rise despite large-scale public health control efforts. Nevertheless,  
40 current vaccines have proven to be invaluable tools for protecting public health and have saved  
41 countless lives.

42 First generation lipid nanoparticle mRNA vaccines including Comirnaty (Pfizer-BioNTech,  
43 previously BNT162b2) and Spikevax (Moderna, previously mRNA-1273) became available in the  
44 United States in December, 2020, and to this day remain the most utilized vaccines in many parts  
45 of the world.<sup>3</sup> These vaccines are both well established as providing temporary prevention of  
46 SARS-CoV-2 infection as well as longer-term protection from severe COVID-19 and death.<sup>4,5</sup> The  
47 primary challenges faced by vaccination-based protection at this stage in the pandemic are  
48 antibody waning and the emergence of concern (VOCs).<sup>6,7</sup> Additional vaccine boosters given  
49 months after initial vaccination have been shown to provide partial protection against novel  
50 variants including Omicron.<sup>8,9</sup> However, the most protective immune responses are seen after a  
51 combination of vaccination and natural infection, also known as hybrid immunity.<sup>10-13</sup>

52 Several key variables influence the protective efficacy of SARS-CoV-2 immunity. The first is the  
53 mechanisms by which immunity is elicited, which may include natural infection or vaccination with  
54 any of the different vaccine types.<sup>13,14</sup> The second is viral antigenic variation, which encompasses  
55 differences in the amino acid sequence and post-translational modification of viral antigens  
56 depending on which variant of SARS-CoV-2 the antigens were derived from.<sup>15,16</sup> The third is timing  
57 between repeat exposures, including the interval between vaccine doses and the much less  
58 studied interval between vaccination and natural infection.<sup>17-20</sup> Additionally, the length of time  
59 since last exposure can lead to waning immunity and decreased protection. However, the  
60 durability of responses from different exposure modes can vary greatly.<sup>13,21,22</sup> Finally, other  
61 variables exist which have important implications for immunity including a person's age, sex, and  
62 comorbidities, and certain therapeutic agents. Understanding the impact of these variables is key  
63 for risk-stratifying populations and guiding general vaccination strategies.

64 As the pandemic continues, separating these variables' individual contributions to immunity  
65 becomes increasingly complex, particularly as global efforts to track infections lose momentum.  
66 Further, as SARS-CoV-2 transitions to a globally endemic virus, hybrid immunity from combined  
67 vaccination and natural infection will be the dominant form of immunity, and while hybrid immunity  
68 is currently the subject of intense focus, very little work has been done thus far to determine the  
69 impact of exposure timing on its development.

70 Here, we report results of studies of 2 cohorts: the first is comprised of individuals recovered from  
71 COVID-19 and paired infection naïve, vaccinated controls from whom serum samples were  
72 collected both before and after vaccination; the second cohort builds on our experience from the  
73 first cohort and includes vaccinated individuals with prior COVID-19, vaccinated individuals that  
74 then experienced breakthrough infection, and infection naïve vaccinated controls. The second  
75 cohort includes individuals with a wide range of intervals (35-404 days) between PCR-confirmed  
76 COVID-19 and vaccination. We utilized enzyme-linked immunosorbent assays (ELISA) and live-  
77 virus neutralization assays with the original SARS-CoV-2 (WA1) and the variants of concern

78 (Alpha, Beta, Gamma, Delta, Omicron BA.1, and Omicron BA.2) to discern how the interval  
79 between vaccination and infection affects the resulting level of humoral immunity. We find that  
80 the magnitude, potency, and breadth of the hybrid immune response against variants continue to  
81 improve for at least 400 days. These results suggest that the primary immune response to either  
82 vaccination or natural infection continues developing for over a year after first exposure, in the  
83 absence of additional exposures and that boosting with the vaccine or infection leads to a hybrid  
84 immunity with dramatically improved antibody quantity and quality as measured by their capacity  
85 to recognize and neutralize emergent SARS-CoV-2 variants.

## 86 **Results**

### 87 ***A longitudinal cohort of vaccinees with previous COVID-19 displayed improved SARS-*** 88 ***CoV-2 neutralization compared to vaccination alone.***

89 Between December 2020 and March 2021, we recruited 10 individuals that experienced PCR-  
90 confirmed COVID-19 prior to vaccination and collected blood samples before and after a standard  
91 two-dose BNT162b2 vaccine regimen (Table 1) and 20 age and sex matched with no self-reported  
92 history of prior COVID-19 infection, verified by negative nucleocapsid ELISA, and collected blood  
93 samples before and after vaccination. We then measured and compared serum neutralizing titers  
94 in for these two groups using a live virus focus reduction neutralization test (FRNT) (Figure 1A-  
95 B). Serum neutralizing titers increased for both groups pre- and post-vaccination and were  
96 significantly higher among those with prior infection compared with vaccination for all strains  
97 tested, including ancestral strain of SARS-CoV-2 (WA1) as well as the early VOCs Alpha, Beta,  
98 and Gamma (Figure 1C). These results suggested that hybrid immunity from the combination of  
99 vaccination and natural infection may result in meaningfully improved neutralizing serum antibody  
100 titers.

### 101 ***A cross-sectional cohort of hybrid immune individuals including both prior infection and*** 102 ***vaccine breakthrough.***

103 To more comprehensively study our initial results suggesting infection followed by vaccination  
104 elicited higher levels of SARS-CoV-2 specific antibodies compared to vaccination alone, we next  
105 expanded on our cohort by recruiting additional vaccinated persons with or without hybrid  
106 immunity due to previous COVID-19 (Table 1). This larger hybrid immune group included 23  
107 individuals with PCR-confirmed infections prior to vaccination and 23 with vaccine breakthrough  
108 infections, as both vaccination/infection histories have been shown to provide similar levels of  
109 serological immunity.<sup>11</sup> To assure a more uniform comparison, sera were collected less than 60  
110 days following vaccination or PCR-confirmed breakthrough infection. The participants with  
111 infection prior to vaccination had all contracted COVID-19 during the pre-VOC era and are thus  
112 believed to have been infected with ancestral SARS-CoV-2 variants, while breakthrough cohort  
113 participants were recruited after the emergence of the VOCs, but prior to the Omicron era (Figure  
114 1D). Using a subset of subjects for whom appropriate samples were available, viral sequences  
115 were obtained from 17 of 23 breakthrough participants with showing that the majority of infections  
116 were caused by the Alpha and Delta VOCs (Table 2).

### 117 ***Elevated antibody levels and neutralizing titers with hybrid immunity.***

118 We next measured spike-specific antibody levels for our larger cohort with a series of ELISA  
119 experiments. Against purified RBD protein, total antigen-specific antibody levels increased 3.6-  
120 fold with hybrid immunity compared to vaccine only (Figure 2A). Class-specific ELISAs showed  
121 that this was primarily driven by improvements in IgG levels, which increased 3.7-fold (Figure 2B),  
122 while the less abundant IgA improved by 3.2-fold (Figure 2C), and IgM levels showed no  
123 significant difference between groups (Figure 2D). Total antibody levels against the full-length

124 spike protein, which includes the entire S1 and S2 domains were also improved with hybrid  
125 immunity by 3.1-fold (Figure 2E).

126 Similarly, neutralizing antibody titers against SARS-CoV-2 and every SARS-CoV-2 variant tested  
127 rose significantly in the hybrid immune group compared to vaccination alone (Figure 2F).  
128 Neutralizing titers improved by 8.4-fold against WA1, 12.5-fold against Alpha, 22.7-fold against  
129 Beta, 9.6-fold against Delta, 19.0-fold against Omicron BA.1, and 13.3-fold against Omicron BA.2.  
130 The largest fold-increases were seen against the most vaccine resistant variants, Beta and  
131 Omicron (BA.1 and BA.2). Further, it appears that these increases were not restricted to variants  
132 with which the cohort was experienced, as all samples were collected prior to the emergence of  
133 Omicron.

134 **Improved antibody quality among hybrid immune individuals.** To assess the breadth of the  
135 neutralizing antibody response, we then looked at the relative ability to neutralize variants. This  
136 was measured by dividing the neutralizing titer for each variant by the neutralizing titer for WA1.  
137 For the Alpha and Beta variants, the hybrid immunity cohort showed greater cross-reactivity  
138 compared to vaccine only cohort and moves closer to equal neutralization compared to WA1  
139 (Figure 3A and 3B). The difference does not appear to be as large for Delta (Figure 3C), while  
140 cross-neutralization against Omicron BA.1 and BA.2 did appear greater, but with cross-reactivity  
141 most marked among those with higher titers (Figure 3D and 3E). This is quantified by the cohort  
142 geometric mean variant cross-neutralization scores, which showed significantly greater cross-  
143 reactivity for all variants except for Delta (Figure 3F and supplemental figure 1).

144 To assess the potency of the neutralizing antibody responses, we then calculated the neutralizing  
145 potency index (NPI) for the individuals in each cohort against each variant. The NPI is the  
146 neutralizing titer divided by the quantity of full-length spike specific total antibody levels as  
147 measured by ELISA. NPI scores indicate the efficiency with which antigen-specific antibodies  
148 neutralize virus on a per total antibody basis in which higher scores indicate that fewer antibodies  
149 are necessary to achieve a given neutralization titer. We found that the NPI of hybrid immune  
150 individuals increased significantly for all variants tested, with indexes of 2.7-fold (WA1), 4.0-fold  
151 (Alpha), 7.2-fold (Beta), 3.0-fold (Delta), 6.1-fold (Omicron BA.1), and 4.2-fold (Omicron BA.2),  
152 indicating a significant improvement in the neutralizing efficiency of the antibodies produced by  
153 hybrid immunity compared to vaccination alone (Figure 3G).

154 **The interval between vaccination and natural infection dictates neutralizing titer levels.** The  
155 hybrid immune cohort includes individuals who developed COVID-19 between 40 and 404 days  
156 post-vaccination, as well as individuals who were vaccinated between 35 and 283 days after  
157 testing positive for COVID-19. This range of hybrid exposure intervals allowed us to determine  
158 the impact of time intervals on the resulting neutralizing antibody response. We also characterized  
159 the correlation between antibody levels and neutralizing titers with our demographic data on age,  
160 exposure interval, sex, and the time from last exposure to sample collection. Only neutralizing  
161 antibody titers and antibody levels were significantly correlated with exposure interval. The  
162 strongest correlations were seen for full-length spike-specific antibody level, as well as  
163 neutralization of WA1, Alpha, Beta, Delta, Omicron BA.1 and Omicron BA.2 (Figure 4A-G).

164 The magnitude of increase seen over time was also different for each of the variants. Using linear  
165 regression, we found the neutralizing titer against WA1 increased 5.3-fold by day 400 (Figure 4).  
166 This increase was 4.8-fold for Alpha, 11.5-fold for Beta, 11.2-fold for Delta, 17.6-fold for Omicron  
167 BA.1, and 14.3-fold for Omicron BA.2. The largest increases were seen against the more  
168 contemporary variants, which also tend to be more vaccine resistant (Figure 2F). To validate that  
169 these trends are not an artifact of linear regression, we also subdivided the cohort into 100-day  
170 exposure interval bins, which recapitulated the previous findings (Figure 4H). Steady increases  
171 are seen each 100 days, resulting in a final increase of 4.2-fold against WA1, 4.1-fold against



172 Alpha, 9.6-fold against Beta, 7.1-fold against Delta, 12.5-fold against Omicron BA.1, and 10.7-  
173 fold against Omicron BA.2 between the 35-100 and 300-404 day exposure interval groups. Both  
174 methods of analysis found a large and significant improvement in neutralizing antibody titers  
175 occurs over an increased duration between the antigen exposures provided by vaccination and  
176 natural infection. Further, these correlations were maintained when measured separately for  
177 individuals with infection prior to vaccination and individuals with vaccine breakthrough infections  
178 (Supplemental figures 2 and 3). Observed separately, neutralizing titers from individuals from the  
179 breakthrough group appeared to increase faster than those in the prior infection group, but no  
180 statistically significant difference could be measured. RBD-specific total antibody and IgG levels  
181 correlated less strongly, while RBD-specific IgA and IgM did not correlate significantly with  
182 exposure interval (Supplemental figure 4).

183 We then assessed for interactions between exposure interval and other variables that could  
184 confound our analyses, including age, sex, or the time between final antigen exposure (either  
185 vaccination or COVID-19 infection) and serum sample collection, all of which have been  
186 previously shown to affect antibody levels.<sup>4,23,24</sup> As expected, titers weakly correlated with age  
187 and sex, but did not approach the relative contribution of exposure interval (Figure 4I).  
188 Collection interval was not significantly correlated with any variable, likely due to our strict 60-day  
189 limit on collection interval for inclusion in the study.

190 ***Variant cross-neutralization improves with greater exposure intervals.*** After observing the  
191 improvements in variant cross-neutralization between hybrid immunity and vaccine only, we  
192 thought to determine whether there was an equivalent dependence on the exposure interval  
193 duration. Alpha is the least vaccine resistant variant and did not improve relative to WA1 because  
194 it started at a ratio of 1 from the beginning (Figure 5A). For the more vaccine resistant variants,  
195 which started well below 1, all saw increased variant cross-neutralization with increasing exposure  
196 interval (Figure 5B-E). This indicates that the neutralizing antibody response is becoming more  
197 broadly neutralizing over time, between exposures. No significant trends were seen with NPI over  
198 time (Supplemental figure 5). This indicates that while the variant cross-reactivity is increasing  
199 with longer exposure intervals, the proportion of antibodies which are capable of neutralization is  
200 maintained.

## 201 Discussion

202 This study reports superior variant-neutralizing serum antibody titers with hybrid immunity from  
203 combined vaccination and natural infection compared to vaccination alone. It further shows that  
204 longer delays, up to at least 400 days, between vaccination and infection result in the largest  
205 improvements in titers as well as better cross-neutralization of variants. The greatest increases  
206 were seen against BA.1 Omicron, which is noteworthy because the samples used in this study  
207 were collected prior to BA.1 emergence. In fact, half of the study participants were infected in the  
208 pre-vaccine era, before the emergence of any VOCs.

209 In our cohort, infection alone provided poor neutralizing antibody responses, while two-dose  
210 mRNA vaccination provided robust responses against original SARS-CoV-2 and the early  
211 variants, but very poor neutralization of Omicron. Hybrid immunity has been shown previously to  
212 result in greater humoral responses than two-dose vaccination,<sup>10-13</sup> and our study expands upon  
213 this by identifying the hybrid exposure interval (the time between infection and vaccination) as an  
214 important factor in determining the strength of the neutralizing response. This was also recently  
215 suggested in a study of breakthrough cases over intervals up to 100 days.<sup>19</sup> The finding that this  
216 effect extends to all hybrid immunity, including infection prior to vaccination is interesting because  
217 it suggests that there is nothing inherently different about the order of two different exposure  
218 modes (vaccination and infection) from the standpoint of neutralizing antibody development.

219 Further, because our prior infection group was never exposed to variant spike protein, it suggests  
220 that many of the conserved epitopes that the memory response develops around are present and  
221 recognizable on both the original strain of SARS-CoV-2 and every VOC including Omicron-BA.1.  
222 This hypothesis is consistent with previous work has shown that memory B cells generated by  
223 infection with original SARS-CoV-2 can recognize the variants,<sup>25</sup> and that germinal center  
224 responses can continue for an extended period that improve cross-reactivity.<sup>26–28</sup> Further, a recent  
225 study found that recruitment of B cells to germinal centers is controlled by the balance of existing  
226 antibody titers and availability of antigen,<sup>29</sup> suggesting that antibody waning may play a direct role  
227 in broadening the antibody response over time. However, an alternative explanation is that each  
228 of the two types of hybrid immunity increase via distinct mechanisms. For instance, breakthrough  
229 infections may be more severe after longer intervals due to antibody waning in the interim, and  
230 more severe infections may lead to greater final titers. Conversely, for infection prior to  
231 vaccination, it is possible that high titers from shorter intervals result in poorer vaccine responses  
232 than at later timepoints. Neither of these alternative hypotheses explain the observation of  
233 improved variant cross-reactivity after longer intervals.

234 The results of this study demonstrate gradually improving memory responses to SARS-CoV-2  
235 infection and vaccination, consistent with previous studies on the importance of an increased  
236 interval between the first two vaccine doses in achieving higher antibody levels.<sup>17,18,20,30</sup> While  
237 booster vaccination has been shown to improve vaccine efficacy, there are relatively few studies  
238 that have focused on the effects of different boosting intervals.<sup>31,32</sup> Currently, fourth doses are  
239 being offered to some groups in many parts of the world, and while early results are promising, it  
240 remains to be seen if continued boosting results in long-term benefits or simply a transitory bump  
241 in protective antibody levels.<sup>33,34</sup>

242 Some studies have pointed to evidence of improved durability of hybrid immune  
243 responses,<sup>12,13,35,36</sup> which may be greater than that provided by boosters,<sup>37</sup> but further studies are  
244 needed to establish whether vaccines which can elicit the same level of response and durability  
245 provided by hybrid immunity; perhaps the best strategy for long-term protection will involve  
246 addition of alternative vaccine types that better mimic natural infection. While hybrid immunity  
247 currently appears to offer the strongest and possibly most durable protection, intentional infection  
248 with natural COVID-19 as a means to achieve immunity is not a reasonable public health  
249 approach given the risks of severe illness, long-term complications, and death that can result from  
250 real SARS-CoV-2 infection.<sup>38</sup> To the contrary, our results support increased access to vaccines.  
251 Demonstration that longer infection-vaccination intervals improve antibody responses implies that  
252 even greatly delayed vaccination will yield sizeable benefits, particularly against emerging  
253 vaccine-resistant variants. Simultaneously, our results point to a future where inevitable vaccine  
254 breakthrough infections would be expected to help build a reservoir of population-level immunity  
255 that can help blunt future waves and reduce the opportunity for further viral evolution.

## 256 **Methods**

### 257 **Cohort**

258 The longitudinal cohort participants were enrolled at Oregon Health & Science University (OHSU)  
259 immediately after receiving their first dose of the BNT162b2 COVID-19 vaccine. A pre-vaccination  
260 blood sample was collected at this time. Participants received a second vaccine dose between  
261 20 and 32 days following the first dose, then returned between 10 and 30 days later for follow up,  
262 at which time a post-vaccination blood sample was collected.

263 The cross-sectional cohort was comprised of health care workers who were enrolled at OHSU,  
264 and individuals were selected from a previously established cohort based on the following

265 criteria:<sup>11</sup> Individuals who experienced COVID-19 prior to vaccination were included if serum  
266 samples were collected less than 60 days after their second vaccine dose. Vaccinated individuals  
267 who experienced vaccine breakthrough COVID-19 infections were included if serum samples  
268 were collected less than 60 days after the date of receiving a positive PCR-based COVID-19 test.  
269 Vaccinated individuals with no history of COVID-19 (vaccine only) were selected based on age,  
270 sex, days between vaccine doses, and days between final vaccine dose and sample collection in  
271 order to match the hybrid immune (combined prior infection and breakthrough) group as closely  
272 as possible.

273 For all participants, 4-6 mL whole blood samples were collected and then centrifuged at 1000xg  
274 for 10 minutes to isolate sera. Sera were aliquoted, heat inactivated at 65°C for 30 minutes, and  
275 frozen at -20°C until needed for laboratory tests.

## 276 Enzyme linked Immunosorbent Assays (ELISA)

277 ELISA experiments were performed as previously described.<sup>11</sup> Briefly, 96-well plates were coated  
278 overnight at 4°C with 1 µg/mL recombinant SARS-CoV-2 spike receptor binding domain (RBD)  
279 protein, or recombinant full-length SARS-CoV-2 spike protein. Plates were washed in phosphate  
280 buffered saline (PBS) with 0.05% Tween-20 (PBST) and blocked with PBST with 5% milk powder  
281 (dilution buffer) for one hour at room temperature (RT). Four-fold serum dilutions were prepared  
282 in dilution buffer starting at 1:50 for IgG/A/M, IgG, and IgA and 1:25 for IgM, then incubated at RT  
283 for an hour. Plates were then washed three times and incubated with secondary antibody in  
284 dilution buffer for another hour at RT. The secondary antibodies used were 1:10,000 α-IgG/A/M-  
285 HRP (Invitrogen, A18847), 1:3,000 α-IgA-HRP (Biolegend, 411002), 1:3,000 α-IgG-HRP (BD  
286 Biosciences, 555788), and 1:3,000 α-IgM-HRP (Bethyl Laboratories, A80-100P). Plates were  
287 washed three more times with PBST and developed with o-phenylenediamine (OPD) for 20  
288 minutes then stopped with 1N HCl. Absorbance was measured at 492nm on a CLARIOstar plate  
289 reader and normalized by subtracting the average of negative control wells and dividing by the  
290 highest concentration from a positive control serum. The serum dilution that resulted in half-  
291 maximal binding was calculated by fitting normalized absorbance values to a dose-response  
292 curve as previously described,<sup>39</sup> and inverse serum dilution values were reported as 50% effective  
293 concentrations (EC<sub>50</sub>).

## 294 Viruses

295 SARS-CoV-2 clinical isolates were obtained from BEI Resources: Isolate USA-WA1/2020  
296 [wildtype] (BEI Resources NR-52281); Isolate USA/CA\_CDC\_5574/2020 [Alpha - B.1.1.7] (BEI  
297 Resources NR-54011); Isolate hCoV-54 19/South Africa/KRISP-K005325/2020 [B.1.351] (BEI  
298 Resources NR-54009); Isolate hCoV-19/Japan/TY7-503/2021 [P.1] (BEI Resources NR-54982);  
299 and Isolate hCoV-19/USA/PHC658/2021 [B.1.617.2] (BEI Resources NR-55611). Isolates were  
300 propagated and titrated in Vero E6 cells as previously described.<sup>11</sup> Vero E6 cells were seeded in  
301 tissue culture flasks such that they were 70-90% confluent at the time of infection. In minimal  
302 volume of Opti-MEM plus 2% FBS, flasks were infected at an MOI of 0.05 for 1 hour at 37°C  
303 before adding additional DMEM plus 10% FBS, 1% penicillin-streptomycin, 1% nonessential  
304 amino acids (complete media) to manufacturer's recommended culture volume. Flasks were  
305 incubated until cytopathic effects were observed, 24-96 hours. Collected supernatants were  
306 centrifuged at 1,000xg for 10 minutes, aliquoted and frozen at -80°C. Titrations were performed  
307 by preparing 10-fold dilutions of frozen aliquots and incubating 30 µL for 1 hour on 96-well plates  
308 of sub-confluent Vero E6 cells before adding Opti-MEM plus 2% FBS, 1% methylcellulose  
309 (overlay media). Titration plates were incubated for 24 hours, or 48 hours for Omicron  
310 sublineages, then fixed with 4% formaldehyde for 1 hour. The formaldehyde was removed, and

311 plates were blocked for 30 minutes at RT with PBS plus 0.1% saponin, 0.1% bovine serum  
312 albumin (perm buffer). The blocking buffer was then replaced with 1:5,000 anti-SARS-CoV-2  
313 alpaca serum (Capralogics Inc.) in perm buffer and incubated overnight at 4°C. The plates were  
314 then washed three times for 5 minutes in PBST and incubated with 1:20,000 anti-alpaca-HRP  
315 (Novus, NB7242) for 2 hours at RT. Plates were then washed three more times with PBST for 5  
316 minutes each, then developed with TrueBlue (SeraCare 5510-0030) for 30 minutes or until foci  
317 were strongly stained. Wells were imaged with a CTL ImmunoSpot Analyzer. Focus counts were  
318 used to calculate the concentration of focus forming units (FFU) in the virus stock aliquots.

### 319 **Focus Reduction Neutralization Test (FRNT)**

320 Focus forming assays were performed as previously described.<sup>11</sup> Briefly, Vero E6 (ATCC CRL-  
321 1586) cells were plated at 20,000 cells/well 16-24 hours before starting the assay. Sera were  
322 diluted in Opti-MEM plus 2% FBS (dilution media). Virus stocks were diluted to 3,333 FFU/mL  
323 (determined by titration) and combined 1:1 with serum dilutions. Initial serum dilutions started at  
324 1:10, which became 1:20 after the 1:1 dilution with virus, and 30 µL of serum/virus mixture was  
325 added to each well for 1 hour at 37°C. Dilution series were performed in duplicate with one no  
326 serum control well for each replicate. Overlay media was added to each well and plates were  
327 incubated for 24 hours, or 48 hours for Omicron sublinages. Plates were fixed with 4%  
328 formaldehyde for 1 hour and then stained similarly to titration plates as described above. Foci in  
329 well images were counted with Viridot (1.0) in R (3.6.3).<sup>40</sup> Percent neutralization for each well was  
330 calculated relative to the average of all no serum control wells on each plate. The serum dilution  
331 that resulted in 50% neutralization was calculated by fitting percent neutralization values to a  
332 dose-response curve as previously described,<sup>39</sup> and inverse serum dilution values were reported  
333 as 50% focus reduction neutralization test (FRNT<sub>50</sub>) titers. For each sample, FRNT<sub>50</sub> values were  
334 first calculated separately for each duplicate and verified to be within 4-fold. Combined FRNT<sub>50</sub>  
335 values were calculated for all samples which passed this test, and samples which failed this test  
336 were excluded from further analysis.

### 337 **Statistical Analysis**

338 The limit of detection (LOD) of each assay was defined by the lowest dilution tested, values below  
339 the LOD were set to LOD – 1 for both ELISA and FRNT experiments. Graphing and statistical  
340 tests were performed in GraphPad Prism. Pairwise comparisons were performed using the Mann-  
341 Whitney U test. The Holm-Šidák multiple comparison correction was used anywhere data are  
342 shown on a continuous X-axis. Simple linear regression was performed on log transformed EC<sub>50</sub>  
343 and FRNT<sub>50</sub> values and significance was determined with an F test with a zero-slope null  
344 hypothesis. Correlations were calculated using Pearson's method. All P values are two-tailed and  
345  $P=0.05$  was the cutoff for significance.  
346

### 347 **Study Approval**

348 This study was conducted in accordance with the Oregon Health & Science University Institutional  
349 Review Board (IRB # 00022511), and written informed consent was obtained from all participants.

350

### 351 **Author Contributions**

352 TAB, HCL, WBM, MEC, FGT conceptualization. TAB, HCL, SKM, ZLL, DXL methodology. TAB  
353 software. TAB, HCL, SKM, DS, WBM, FGT, MEC validation. TAB, DS, WBM formal analysis.  
354 TAB, HCL, SKM, DS investigation. WBM, MEC, FGT resources. TAB, HCL, DS data curation.



355 TAB writing – original draft. TAB, HCL, SKM, DS, ZLL, DXL, WBM, MEC, FGT writing – review &  
356 editing. TAB, DS visualization. TAB, WBM, MEC, FGT supervision. TAB, WBM, MEC, FGT project  
357 administration. TAB, WBM, MEC, FGT funding acquisition.

358

### 359 **Acknowledgements**

360 This study was funded by a grant from the M. J. Murdock Charitable Trust (to MEC), an  
361 unrestricted grant from the OHSU Foundation (to MEC), the NIH training grant T32HL083808 (to  
362 TAB), NIH grant R011R01AI141549-01A1 (to FGT), OHSU Innovative IDEA grant 1018784 (to  
363 FGT), and NIH grant R01AI145835 (to WBM).

364 We thank the participants of this study for their contribution. We additionally thank the OHSU  
365 COVID-19 serology study team and the OHSU department of Occupational Health for recruiting  
366 participants and collecting samples, and the OHSU clinical laboratory under the direction of D.  
367 Hansel and X. Qin for SARS-CoV-2 testing and reporting.

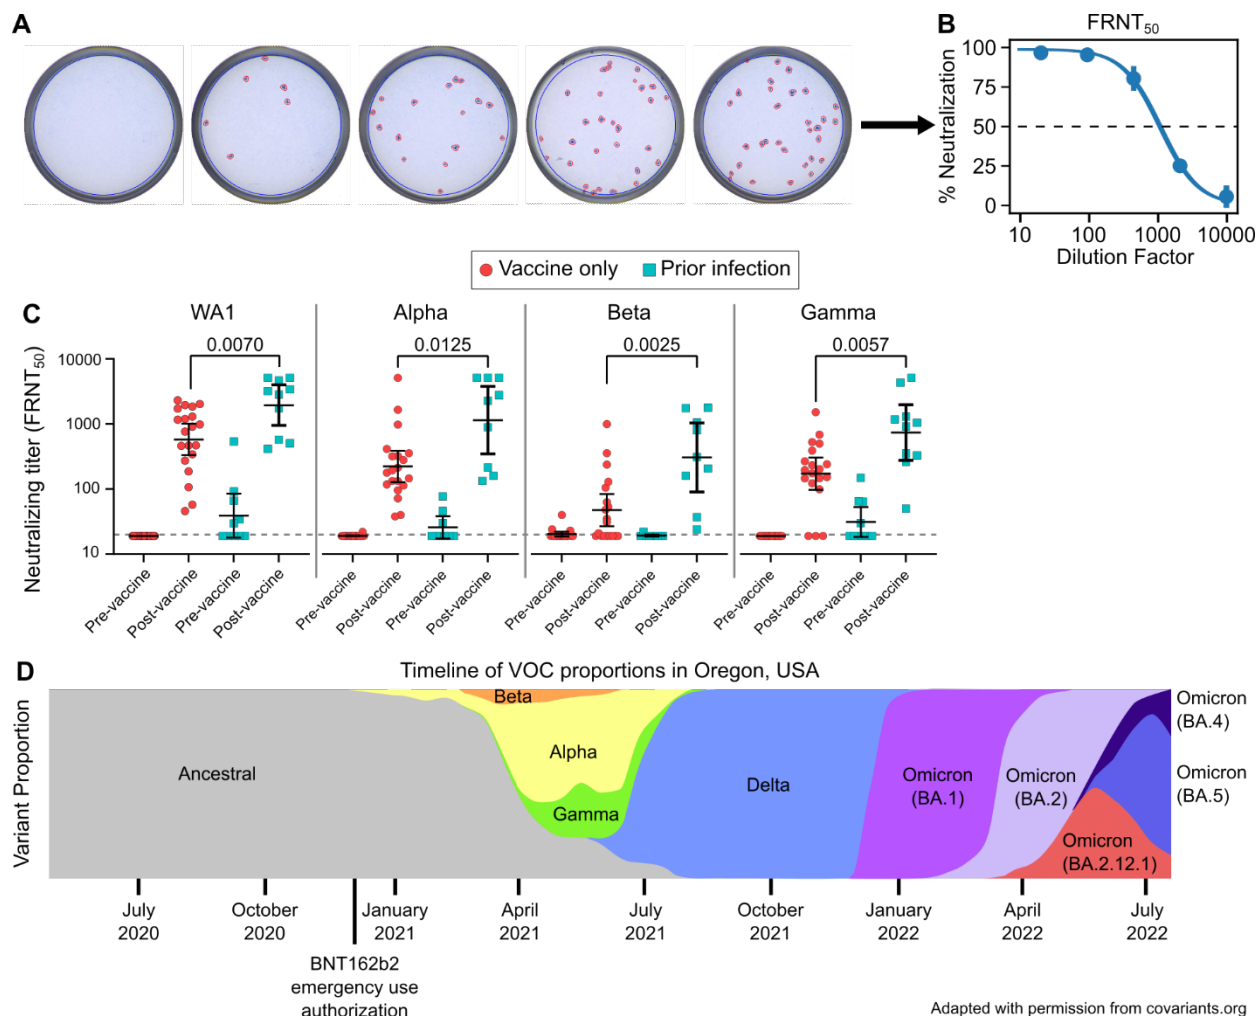

368

369 **Figure 1: Longitudinal cohort of previously infected vaccinees shows improved variant**  
 370 **neutralization compared to vaccination alone**

371 Representative focus reduction neutralization test (FRNT) results showing wells infected with live  
 372 SARS-CoV-2 with the addition of serially diluted serum which were stained and counted (**A**).  
 373 Representative focus reduction neutralization curve showing the average neutralization of  
 374 duplicates as a percent of no serum controls and fit to a dose-response curve to find the 50%  
 375 neutralizing titer (FRNT<sub>50</sub>) (**B**). Live virus FRNT<sub>50</sub> measurements against original SARS-CoV-2  
 376 (WA1) and the Alpha, Beta, and Gamma variants before and after vaccination (**C**). Timeline  
 377 depicting the prevalence of impactful variants in the study location, Oregon, USA (**D**).<sup>41</sup> Vaccine-  
 378 only participants are represented by red circles and hybrid immune participants by cyan squares.  
 379 Error bars represent the geometric mean with 95% confidence intervals. P values in C show the  
 380 result of Mann-Whitney U tests. All P values are two-tailed and 0.05 was considered significant.  
 381 For panel C, n=20 for the vaccine only group and n=10 for the prior infection group.

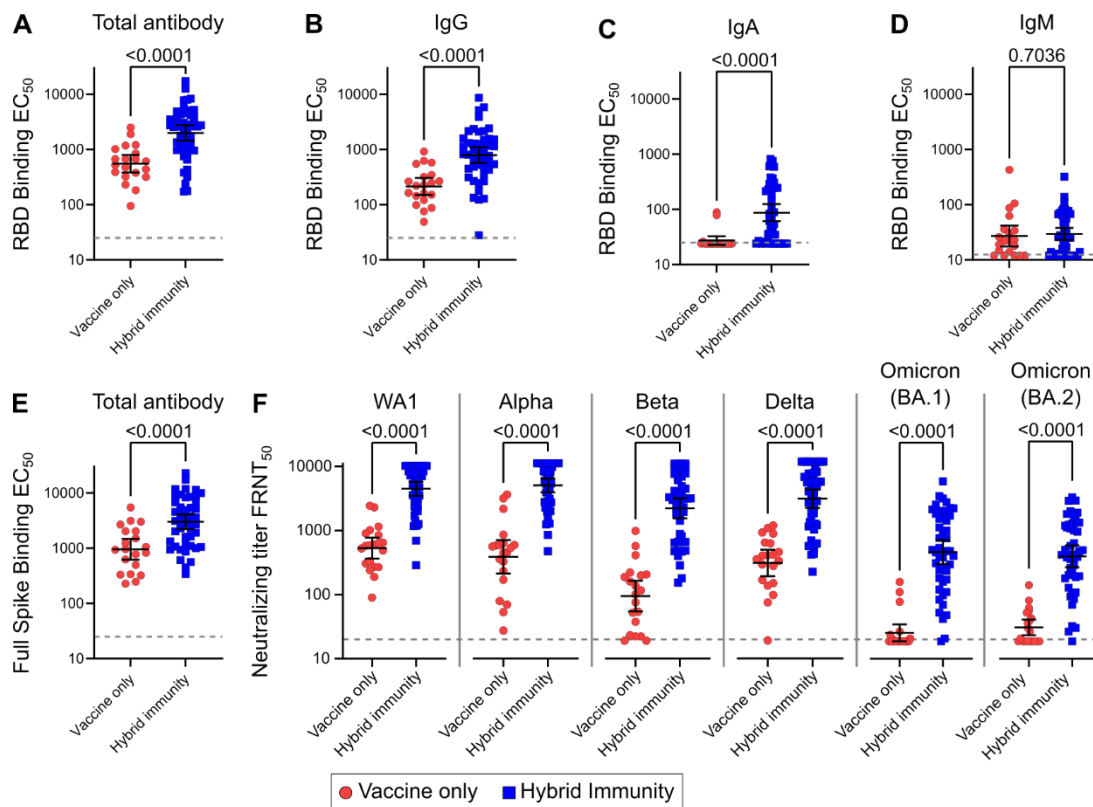

382

383 **Figure 2: Cross-sectional cohort of individuals with hybrid immunity show improved**  
384 **antibody levels and variant neutralization**

385 Levels of SARS-CoV-2 spike receptor binding domain (RBD)-specific total (IgG/A/M) antibody  
386 (A), IgG (B), IgA (C), and IgM (D). Levels of full-length spike-specific total antibody (E). Live virus  
387 FRNT<sub>50</sub> measurements against original SARS-CoV-2 (WA1) and the Alpha, Beta, Delta, Omicron  
388 (BA.1), and Omicron (BA.2) variants (F). Vaccine only participants are represented by red circles  
389 and hybrid immune participants by blue squares. Error bars represent the geometric mean with  
390 95% confidence intervals. P values in A-F show the result of Mann-Whitney U tests. All P values  
391 are two-tailed and 0.05 was considered significant. For panels A-F, n=20 for the vaccine only  
392 group and n=46 for the hybrid immunity group.

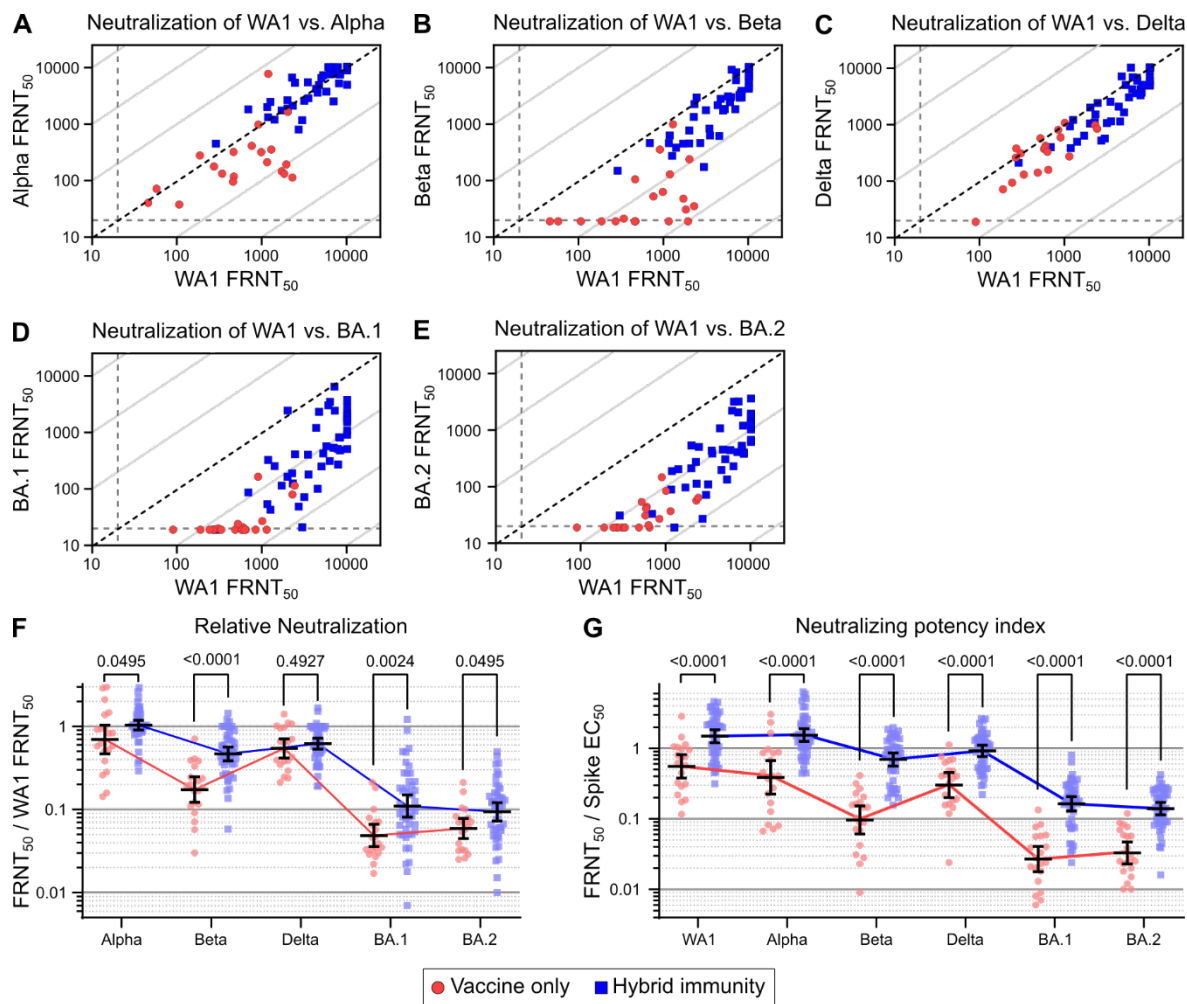

393

394 **Figure 3: Antibody quality and variant cross-neutralization are improved with hybrid**  
 395 **immunity**

396 Individual neutralizing FRNT<sub>50</sub> values against WA1 versus Alpha (**A**), Beta (**B**), Delta (**C**), Omicron  
 397 (BA.1) (**D**), and Omicron (BA.2) (**E**). Diagonal broken line indicates equal neutralization of WA1  
 398 and variant in A-D. Relative neutralization, calculated as the neutralizing titer against each of the  
 399 variants divided by the neutralizing titer against WA1 (**F**). Neutralizing potency index indicates the  
 400 neutralizing FRNT<sub>50</sub> against the indicated variant divided by full-length spike protein EC<sub>50</sub> antibody  
 401 levels (**G**). Vaccine-only participants are represented by red circles and hybrid immune  
 402 participants by blue squares. Error bars represent the geometric mean with 95% confidence  
 403 intervals. P values in F-G show the result of Mann-Whitney U tests with the Holm-Šidák multiple  
 404 comparison correction. All P values are two-tailed and 0.05 was considered significant. For panels  
 405 A-G, n=20 for the vaccine only group and n=46 for the hybrid immunity group.



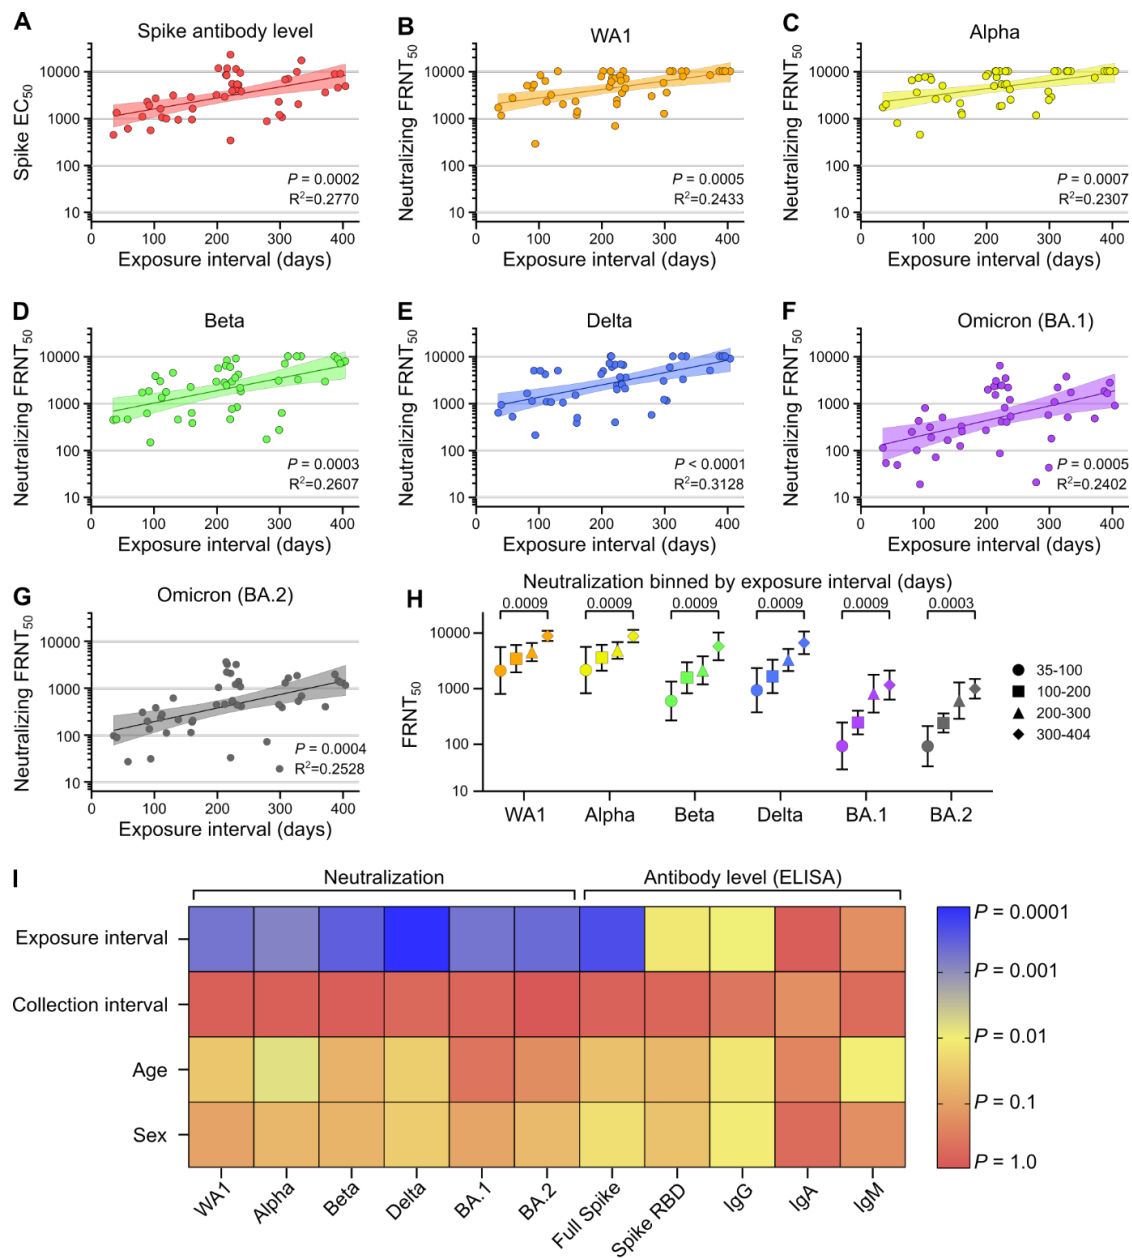

406

#### 407 **Figure 4: Exposure interval determines strength of hybrid immunity**

408 Comparison of exposure interval, the time between first and last antigen exposure, with full-length  
 409 spike EC<sub>50</sub> antibody levels (**A**), and neutralization of WA1 (**B**), Alpha (**C**), Beta (**D**), Delta (**E**),  
 410 Omicron (BA.1) (**F**), and Omicron (BA.2) (**G**). Neutralization of variants binned by exposure  
 411 interval in days (**H**). Heat map of correlation significance between explanatory and response  
 412 variables (**I**). Individual values in A-G are shown as filled circles and the shaded area indicates  
 413 the linear fit with 95% confidence interval.  $R^2$  is indicated for each curve fit. P values in A-G show  
 414 the result of an F-test using a zero slope null hypothesis, P values in H show the result of Mann-  
 415 Whitney U tests with the Holm-Šídák multiple comparison correction, and colors in I represent the  
 416 P values of pearson r correlation coefficients according to the scale bar. All P values are two-  
 417 tailed and 0.05 was considered significant. For panels A-G and I, n=46. For panel H, n=7 for the  
 418 35-100 days group, n=10 for the 101-200 days group, n=18 for the 201-300 days group, and n=11  
 419 for the 301-404 days group.

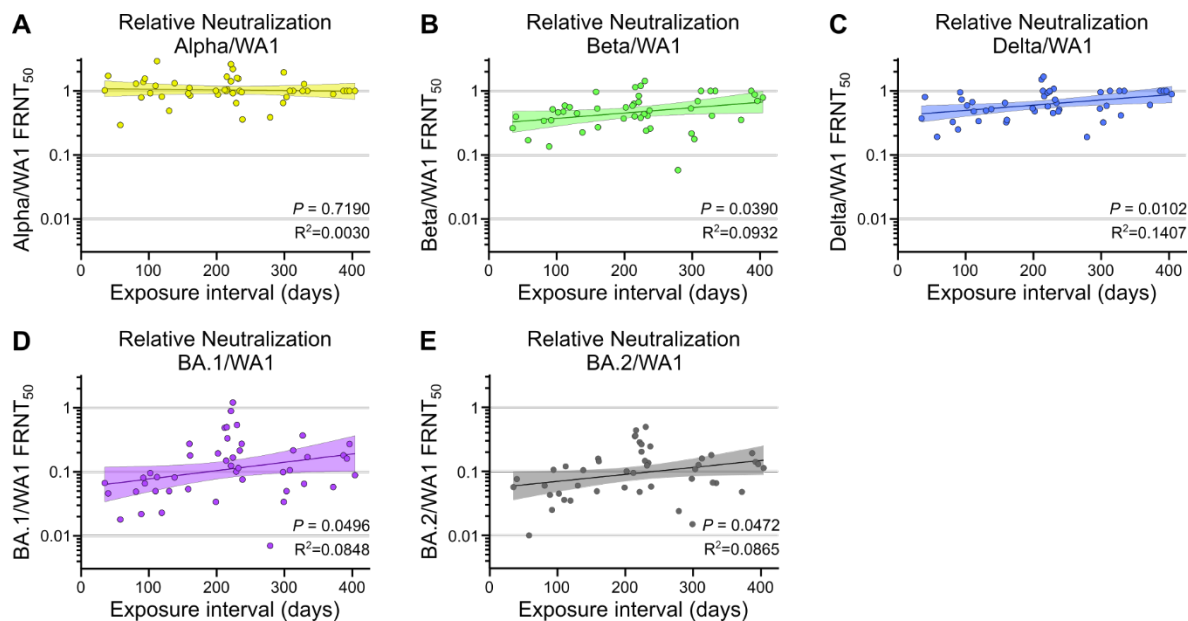

420

421 **Figure 5: Exposure interval increases variant cross-neutralization by hybrid immune sera**

422 Comparison of exposure interval, the time between first and last antigen exposure, with relative  
423 neutralization of Alpha (A), Beta (B), Delta (C), Omicron (BA.1) (D), and Omicron (BA.2) (E) over  
424 wildtype (WA1). Individual values are shown as filled circles and the shaded area indicates the  
425 linear fit with 95% confidence interval. R<sup>2</sup> is indicated for each curve fit. P values show the result  
426 of an F-test using a zero slope null hypothesis. All P values are two-tailed and 0.05 was  
427 considered significant. For panels A-E, n=46.

428 **Table 1: Demographics**

|                              |                        | Pre/post vaccination (longitudinal) |              |                 | Post vaccine (cross-sectional) |                 |                 |                        |              |
|------------------------------|------------------------|-------------------------------------|--------------|-----------------|--------------------------------|-----------------|-----------------|------------------------|--------------|
|                              |                        | All                                 | Vaccine only | Prior infection | All                            | Hybrid immunity |                 |                        |              |
|                              |                        |                                     |              |                 |                                | Vaccine only    | Prior infection | Breakthrough infection |              |
| <b>Cohort size</b>           | n                      | 30                                  | 20           | 10              | 66                             | 20              | 46              | 23                     | 23           |
| <b>Age</b>                   | Years - median [range] | 39.5 [23-63]                        | 41.5 [25-63] | 36.5 [23-61]    | 39.5 [23-73]                   | 39.5 [23-63]    | 40 [23-73]      | 47 [23-73]             | 38 [24-63]   |
| <b>Sex</b>                   | Male - n (%)           | 10 (33)                             | 6 (30)       | 4 (40)          | 18 (27)                        | 3 (15)          | 15 (33)         | 10 (43)                | 5 (22)       |
|                              | Female - n (%)         | 20 (67)                             | 14 (70)      | 6 (60)          | 48 (73)                        | 17 (85)         | 31 (67)         | 13 (57)                | 18 (78)      |
| <b>disease severity</b>      | Asymptomatic - n (%)   | -                                   | -            | 2 (20)          | -                              | -               | 3 (7)           | 3 (13)                 | 0 (0)        |
|                              | Mild - n (%)           | -                                   | -            | 7 (70)          | -                              | -               | 39 (85)         | 19 (83)                | 20 (87)      |
|                              | Moderate - n (%)       | -                                   | -            | 1 (10)          | -                              | -               | 3 (7)           | 1 (4)                  | 2 (9)        |
| <b>between vaccine doses</b> | Days - median [range]  | 22 [20-32]                          | 21 [21-32]   | 22 [20-25]      | 21 [17-45]                     | 21 [21-25]      | 21 [17-45]      | 22 [18-45]             | 21 [17-32]   |
| <b>exposure interval*</b>    | Days - median [range]  | -                                   | -            | 98 [40-303]     | -                              | -               | 221 [35-404]    | 299 [40-404]           | 215 [35-238] |
| <b>collection interval**</b> | Days - median [range]  | 17 [10-28]                          | 16 [10-25]   | 18 [14-28]      | 23 [10-53]                     | 19.5 [10-28]    | 25.5 [10-53]    | 25 [11-53]             | 27 [10-49]   |

429

430 **Table 2: variants of infections**

|                               | N  | %   |
|-------------------------------|----|-----|
| <b>Prior infection</b>        | 23 | 100 |
| Not sequenced*                | 23 | 100 |
| <b>Breakthrough infection</b> | 23 | 100 |
| Alpha                         | 4  | 17  |
| Beta                          | 1  | 4   |
| Gamma                         | 2  | 9   |
| Delta                         | 10 | 43  |
| Not sequenced**               | 6  | 26  |

431

432 Supplementary information:

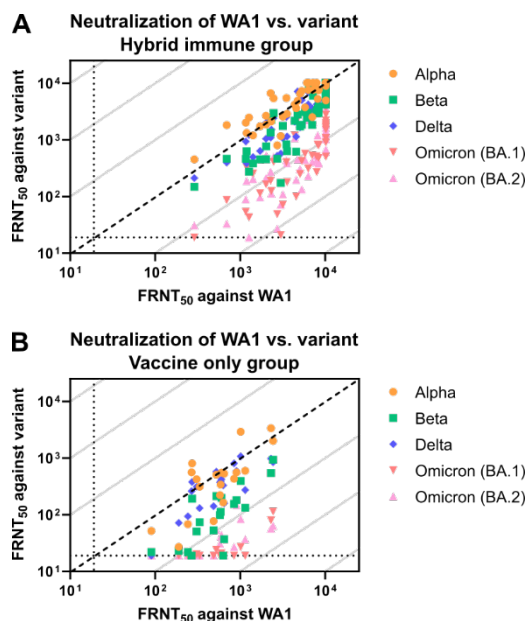

433

434 **Supplemental figure 1: Variant cross-neutralization by hybrid immune sera is improved**  
435 **compared to vaccination alone**

436 Individual neutralizing FRNT<sub>50</sub> values for each of the variants against WA1 for the hybrid immune  
437 group (A), and two-dose vaccine only group (B). Diagonal broken line indicates equal  
438 neutralization of WA1 and variant. For panels A-B, n=20 for the vaccine only group and n=46 for  
439 the hybrid immunity group.



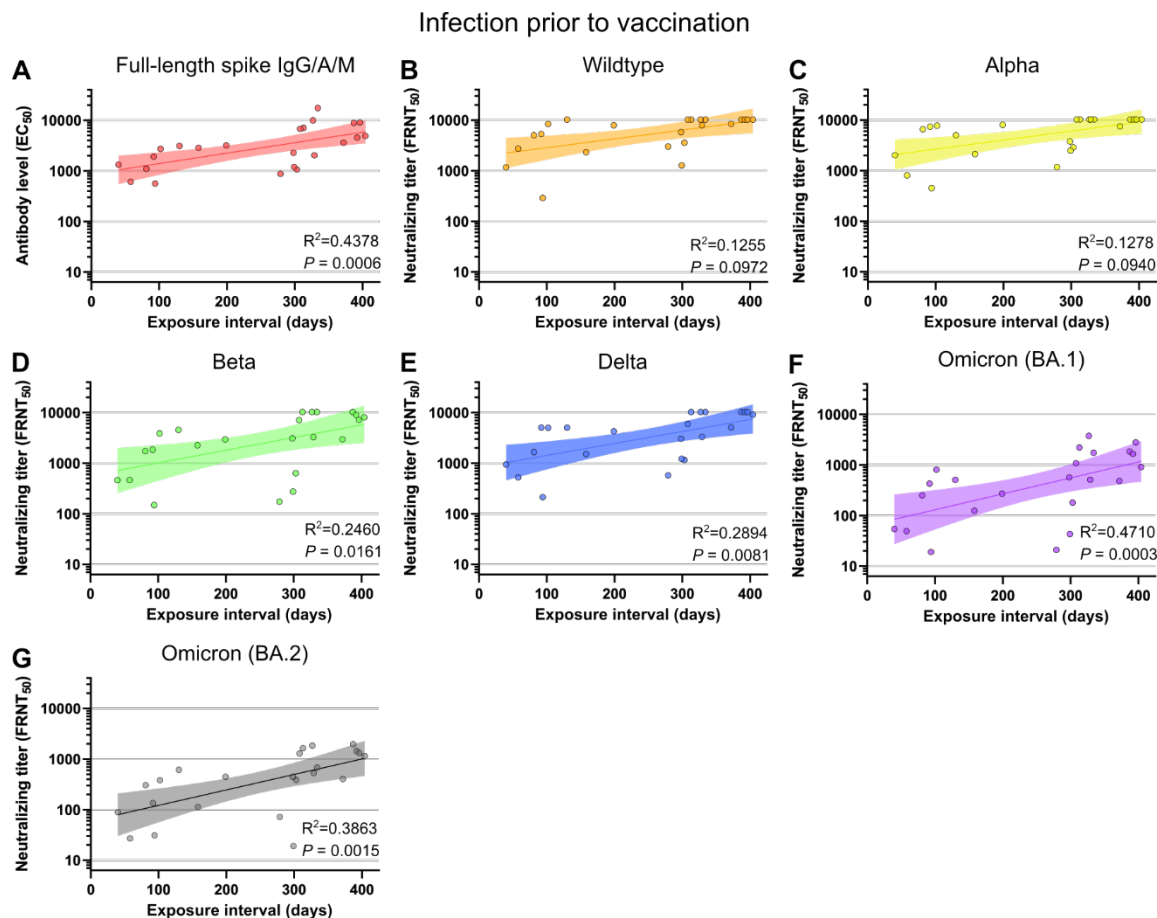

440

441 **Supplemental figure 2: Infection prior to vaccination group neutralizing responses**  
442 **correlate with exposure interval**

443 Comparison of exposure interval, the time between first and last antigen exposure, among  
444 individuals with SARS-CoV-2 infection prior to vaccination. Correlations are shown for full-length  
445 spike  $EC_{50}$  antibody levels (**A**), and neutralization of WA1 (**B**), Alpha (**C**), Beta (**D**), Delta (**E**),  
446 Omicron (BA.1) (**F**), and Omicron (BA.2) (**G**). Individual values are shown as filled circles and the  
447 shaded area indicates the linear fit with 95% confidence interval.  $R^2$  is indicated for each curve fit  
448 and P values show the result of an F-test using a zero slope null hypothesis. All P values are two-  
449 tailed and 0.05 was considered significant. For panels A-G,  $n=23$ .

### Infection following infection (breakthrough)

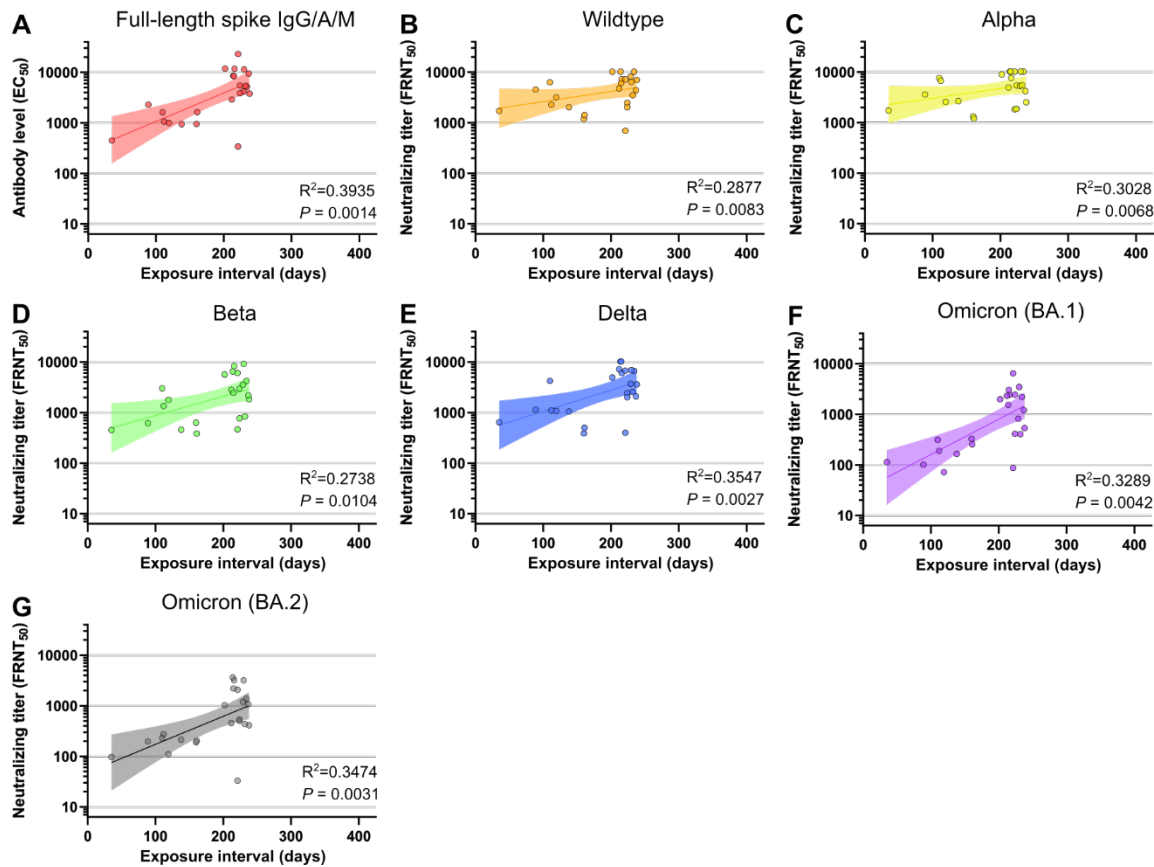

450

### 451 **Supplemental figure 3: Vaccine breakthrough group neutralizing responses correlate with** 452 **exposure interval**

453 Comparison of exposure interval, the time between first and last antigen exposure, among  
454 individuals with vaccine breakthrough infections. Correlations are shown for full-length spike EC<sub>50</sub>  
455 antibody levels (A), and neutralization of WA1 (B), Alpha (C), Beta (D), Delta (E), Omicron (BA.1)  
456 (F), and Omicron (BA.2) (G). Individual values are shown as filled circles and the shaded area  
457 indicates the linear fit with 95% confidence interval. R<sup>2</sup> is indicated for each curve fit and P values  
458 show the result of an F-test using a zero slope null hypothesis. All P values are two-tailed and  
459 0.05 was considered significant. For panels A-G, n=23.

### Antibody levels vs. exposure interval

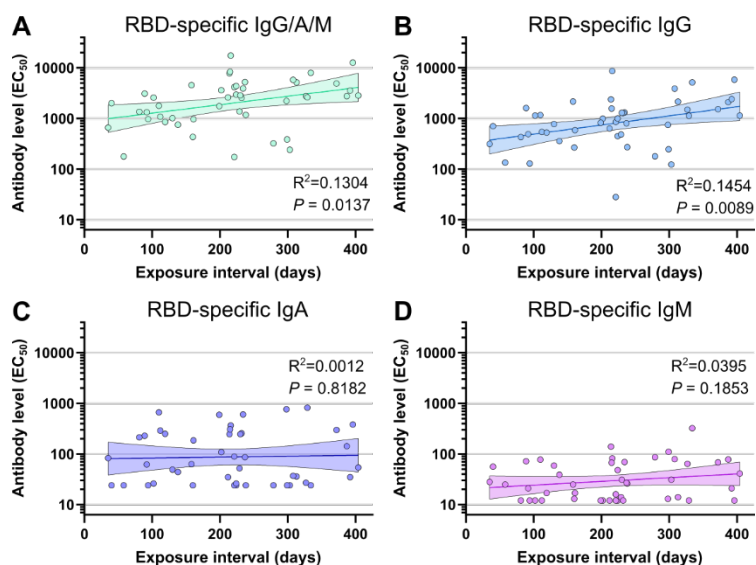

460

#### 461 **Supplemental figure 4: Other antibody isotypes correlate less well with exposure interval**

462 Comparison of exposure interval, the time between first and last antigen exposure, with total  
463 (IgG/A/M) spike RBD (A), IgG (B), IgA (C), and IgM (D) EC<sub>50</sub> antibody levels. Individual values  
464 are shown as filled circles and the shaded areas indicate the linear fit with 95% confidence  
465 interval.  $R^2$  is indicated for each curve fit and P values show the result of an F-test using a zero  
466 slope null hypothesis. All P values are two-tailed and 0.05 was considered significant. For panels  
467 A-D, n=46.

468

### Neutralizing potency index vs. exposure interval

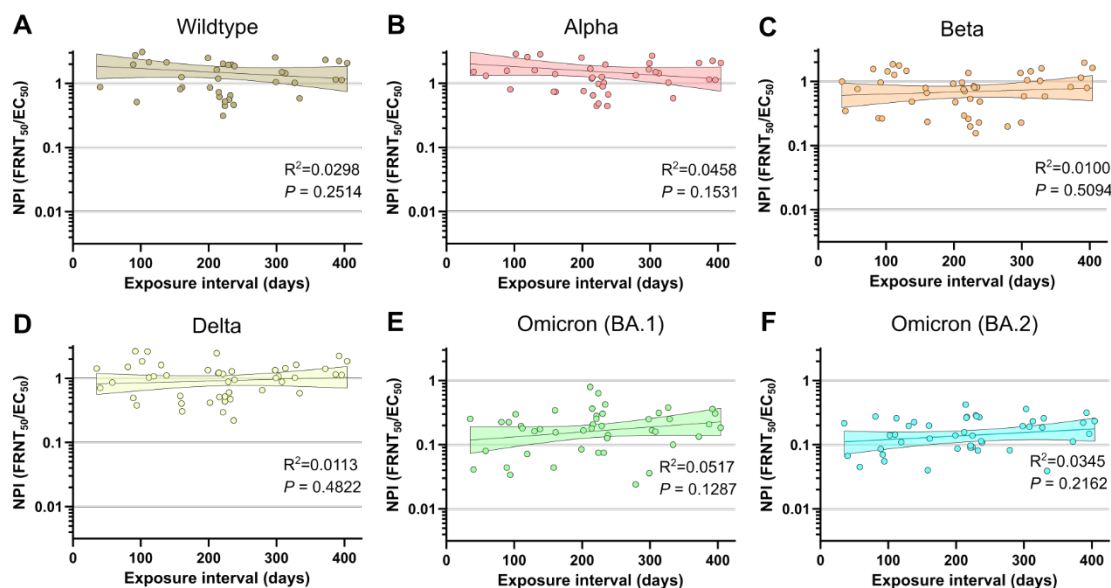

469

### 470 Supplemental figure 5: Neutralizing potency index does not correlate with exposure 471 interval

472 Comparison of exposure interval, the time between first and last antigen exposure, with  
473 neutralization potency index (FRNT<sub>50</sub> / full-length spike EC<sub>50</sub>) of wildtype (WA1) (A), Alpha (B),  
474 Beta (C), Delta (D), Omicron (BA.1) (E), and Omicron (BA.2) (F). Individual values are shown as  
475 filled circles and the shaded area indicates the linear fit with 95% confidence interval. R<sup>2</sup> is  
476 indicated for each curve fit. P values show the result of an F-test using a zero slope null  
477 hypothesis. All P values are two-tailed and 0.05 was considered significant. For panels A-F, n=46.



478 **References**

- 479 1. Dong, E., Du, H. & Gardner, L. An interactive web-based dashboard to track COVID-19 in  
480 real time. *The Lancet Infectious Diseases* **20**, 533–534 (2020).
- 481 2. Estimating global, regional, and national daily and cumulative infections with SARS-CoV-2  
482 through Nov 14, 2021: a statistical analysis. *The Lancet* (2022) doi:10.1016/S0140-  
483 6736(22)00484-6.
- 484 3. Ritchie, H. *et al.* Coronavirus Pandemic (COVID-19). *Our World in Data* (2020).
- 485 4. Cohn, B. A., Cirillo, P. M., Murphy, C. C., Krigbaum, N. Y. & Wallace, A. W. SARS-CoV-2  
486 vaccine protection and deaths among US veterans during 2021. *Science* **375**, 331–336  
487 (2022).
- 488 5. Rosenberg, E. S. New COVID-19 Cases and Hospitalizations Among Adults, by Vaccination  
489 Status — New York, May 3–July 25, 2021. *MMWR Morb Mortal Wkly Rep* **70**, (2021).
- 490 6. Tartof, S. Y. *et al.* Effectiveness of mRNA BNT162b2 COVID-19 vaccine up to 6 months in a  
491 large integrated health system in the USA: a retrospective cohort study. *Lancet* **398**, 1407–  
492 1416 (2021).
- 493 7. Goldberg, Y. *et al.* Waning Immunity after the BNT162b2 Vaccine in Israel. *N Engl J Med* **385**,  
494 e85 (2021).
- 495 8. Choi, A. *et al.* Safety and immunogenicity of SARS-CoV-2 variant mRNA vaccine boosters in  
496 healthy adults: an interim analysis. *Nat Med* 1–7 (2021) doi:10.1038/s41591-021-01527-y.
- 497 9. Garcia-Beltran, W. F. *et al.* mRNA-based COVID-19 vaccine boosters induce neutralizing  
498 immunity against SARS-CoV-2 Omicron variant. *Cell* (2022) doi:10.1016/j.cell.2021.12.033.
- 499 10. Wratil, P. R. *et al.* Three exposures to the spike protein of SARS-CoV-2 by either infection or  
500 vaccination elicit superior neutralizing immunity to all variants of concern. *Nat Med* **28**, 496–  
501 503 (2022).
- 502 11. Bates, T. A. *et al.* Vaccination before or after SARS-CoV-2 infection leads to robust humoral  
503 response and antibodies that effectively neutralize variants. *Science Immunology* (2022)  
504 doi:10.1126/sciimmunol.abn8014.
- 505 12. Pilz, S., Theiler-Schwetz, V., Trummer, C., Krause, R. & Ioannidis, J. P. A. SARS-CoV-2  
506 reinfections: Overview of efficacy and duration of natural and hybrid immunity. *Environ Res*  
507 **209**, 112911 (2022).
- 508 13. Goldberg, Y. *et al.* Protection and Waning of Natural and Hybrid Immunity to SARS-CoV-2.  
509 *New England Journal of Medicine* **0**, null (2022).
- 510 14. Cromer, D. *et al.* Neutralising antibody titres as predictors of protection against SARS-CoV-2  
511 variants and the impact of boosting: a meta-analysis. *The Lancet Microbe* **3**, e52–e61 (2022).
- 512 15. Bates, T. A. *et al.* Antibody Response and Variant Cross-Neutralization After SARS-CoV-2  
513 Breakthrough Infection. *JAMA* (2021) doi:10.1001/jama.2021.22898.
- 514 16. Rössler, A., Riepler, L., Bante, D., von Laer, D. & Kimpel, J. SARS-CoV-2 Omicron Variant  
515 Neutralization in Serum from Vaccinated and Convalescent Persons. *New England Journal*  
516 *of Medicine* **386**, 698–700 (2022).
- 517 17. Payne, R. P. *et al.* Immunogenicity of standard and extended dosing intervals of BNT162b2  
518 mRNA vaccine. *Cell* **184**, 5699-5714.e11 (2021).
- 519 18. Hall, V. G. *et al.* Delayed-interval BNT162b2 mRNA COVID-19 vaccination enhances humoral  
520 immunity and induces robust T cell responses. *Nat Immunol* 1–6 (2022) doi:10.1038/s41590-  
521 021-01126-6.
- 522 19. Miyamoto, S. *et al.* Vaccination-infection interval determines cross-neutralization potency to  
523 SARS-CoV-2 Omicron after breakthrough infection by other variants. *Med* **3**, 249-261.e4  
524 (2022).
- 525 20. Sanchez, S., Palacio, N., Dang, T., Ciucci, T. & Penaloza-MacMaster, P. Fractionating a  
526 COVID-19 Ad5-vectored vaccine improves virus-specific immunity. *Science Immunology* **6**,  
527 eabi8635 (2021).

- 528 21. Ferdinands, J. M. *et al.* Waning 2-Dose and 3-Dose Effectiveness of mRNA Vaccines Against  
529 COVID-19–Associated Emergency Department and Urgent Care Encounters and  
530 Hospitalizations Among Adults During Periods of Delta and Omicron Variant Predominance  
531 — VISION Network, 10 States, August 2021–January 2022. *MMWR Morb. Mortal. Wkly. Rep.*  
532 **71**, (2022).
- 533 22. Levin, E. G. *et al.* Waning Immune Humoral Response to BNT162b2 Covid-19 Vaccine over  
534 6 Months. *New England Journal of Medicine* (2021) doi:10.1056/NEJMoa2114583.
- 535 23. Anastassopoulou, C. *et al.* Age and sex associations of SARS-CoV-2 antibody responses  
536 post BNT162b2 vaccination in healthcare workers: A mixed effects model across two  
537 vaccination periods. *PLOS ONE* **17**, e0266958 (2022).
- 538 24. Bates, T. A. *et al.* Age-Dependent Neutralization of SARS-CoV-2 and P.1 Variant by Vaccine  
539 Immune Serum Samples. *JAMA* (2021) doi:10.1001/jama.2021.11656.
- 540 25. Lyski, Z. L. *et al.* SARS-CoV-2 specific memory B-cells from individuals with diverse disease  
541 severities recognize SARS-CoV-2 variants of concern. *J Infect Dis* jia585 (2021)  
542 doi:10.1093/infdis/jia585.
- 543 26. Sakharkar, M. *et al.* Prolonged evolution of the human B cell response to SARS-CoV-2  
544 infection. *Science Immunology* **6**, (2021).
- 545 27. Turner, J. S. *et al.* SARS-CoV-2 mRNA vaccines induce persistent human germinal centre  
546 responses. *Nature* **596**, 109–113 (2021).
- 547 28. Kim, W. *et al.* Germinal centre-driven maturation of B cell response to mRNA vaccination.  
548 *Nature* 1–8 (2022) doi:10.1038/s41586-022-04527-1.
- 549 29. Tas, J. M. J. *et al.* Antibodies from primary humoral responses modulate the recruitment of  
550 naive B cells during secondary responses. *Immunity* (2022)  
551 doi:10.1016/j.immuni.2022.07.020.
- 552 30. Grunau, B. *et al.* Immunogenicity of Extended mRNA SARS-CoV-2 Vaccine Dosing Intervals.  
553 *JAMA* **327**, 279–281 (2022).
- 554 31. Zhao, X. *et al.* Effects of a Prolonged Booster Interval on Neutralization of Omicron Variant.  
555 *New England Journal of Medicine* **0**, null (2022).
- 556 32. Andrews, N. *et al.* Effectiveness of COVID-19 booster vaccines against COVID-19-related  
557 symptoms, hospitalization and death in England. *Nat Med* **28**, 831–837 (2022).
- 558 33. Magen, O. *et al.* Fourth Dose of BNT162b2 mRNA Covid-19 Vaccine in a Nationwide Setting.  
559 *New England Journal of Medicine* **386**, 1603–1614 (2022).
- 560 34. Regev-Yochay, G. *et al.* Efficacy of a Fourth Dose of Covid-19 mRNA Vaccine against  
561 Omicron. *New England Journal of Medicine* **386**, 1377–1380 (2022).
- 562 35. Epsi, N. J. *et al.* Understanding ‘hybrid immunity’: comparison and predictors of humoral  
563 immune responses to SARS-CoV-2 infection and COVID-19 vaccines. *Clinical Infectious*  
564 *Diseases* ciac392 (2022) doi:10.1093/cid/ciac392.
- 565 36. Nordström, P., Ballin, M. & Nordström, A. Risk of SARS-CoV-2 reinfection and COVID-19  
566 hospitalisation in individuals with natural and hybrid immunity: a retrospective, total population  
567 cohort study in Sweden. *The Lancet Infectious Diseases* **0**, (2022).
- 568 37. Vanshylla, K. *et al.* Durability of omicron-neutralising serum activity after mRNA booster  
569 immunisation in older adults. *The Lancet Infectious Diseases* **22**, 445–446 (2022).
- 570 38. Al-Aly, Z., Bowe, B. & Xie, Y. Long COVID after breakthrough SARS-CoV-2 infection. *Nat*  
571 *Med* 1–7 (2022) doi:10.1038/s41591-022-01840-0.
- 572 39. Bates, T. A. *et al.* Neutralization of SARS-CoV-2 variants by convalescent and BNT162b2  
573 vaccinated serum. *Nat Commun* **12**, 5135 (2021).
- 574 40. Katzelnick, L. C. *et al.* Viridot: An automated virus plaque (immunofocus) counter for the  
575 measurement of serological neutralizing responses with application to dengue virus. *PLOS*  
576 *Neglected Tropical Diseases* **12**, e0006862 (2018).
- 577 41. Hodcroft, E. B. CoVariants: SARS-CoV-2 Mutations and Variants of Interest.  
578 <https://covariants.org/> (2021).
